# Supplementary material for: Verification of In Vitro Anticancer Activity and Bioactive Compounds in Cordyceps Militaris-Infused Sweet Potato Shochu Spirits
Source: MDPI journal article supplement (doi:10.3390/molecules29092119), 2024-05-03
Supplement: s1 [file s1]

Supplementary Figures

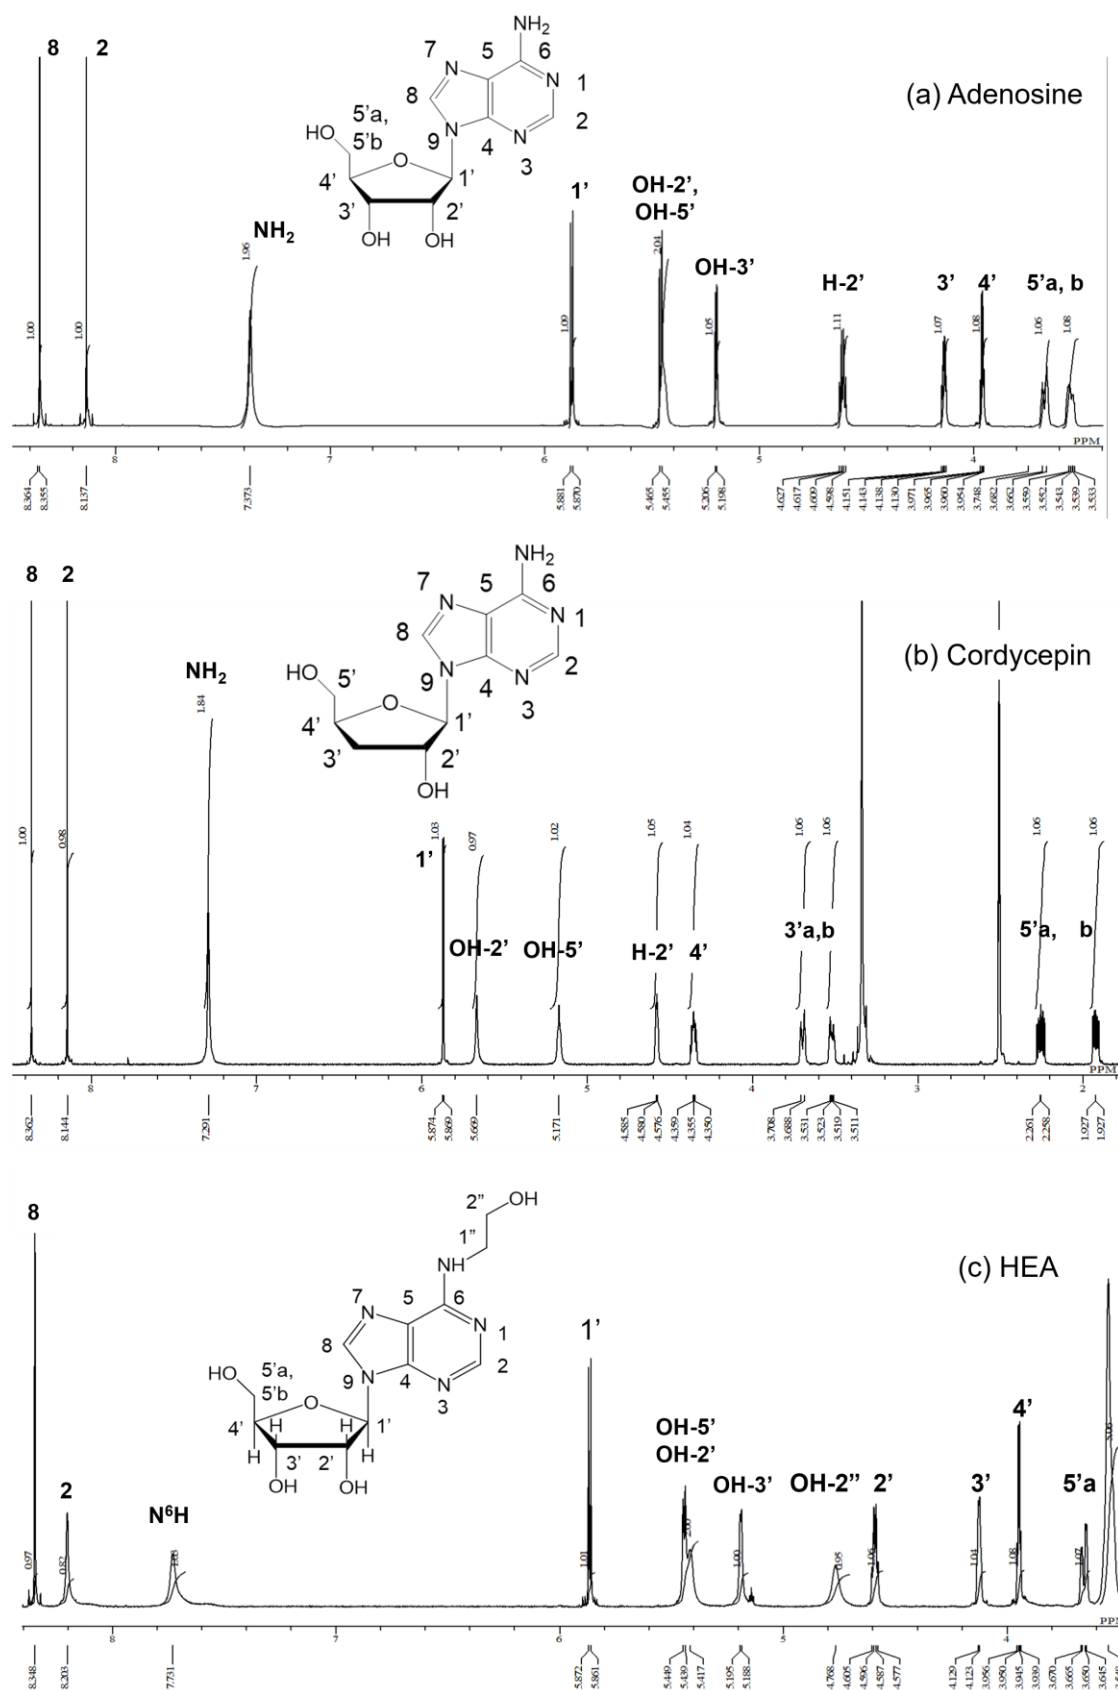

**Figure S1.** <sup>1</sup>H-NMR spectrum of (a) Adenosine, (b) Cordycepin and (c) HEA in DMSO-*d*<sub>6</sub> solvent

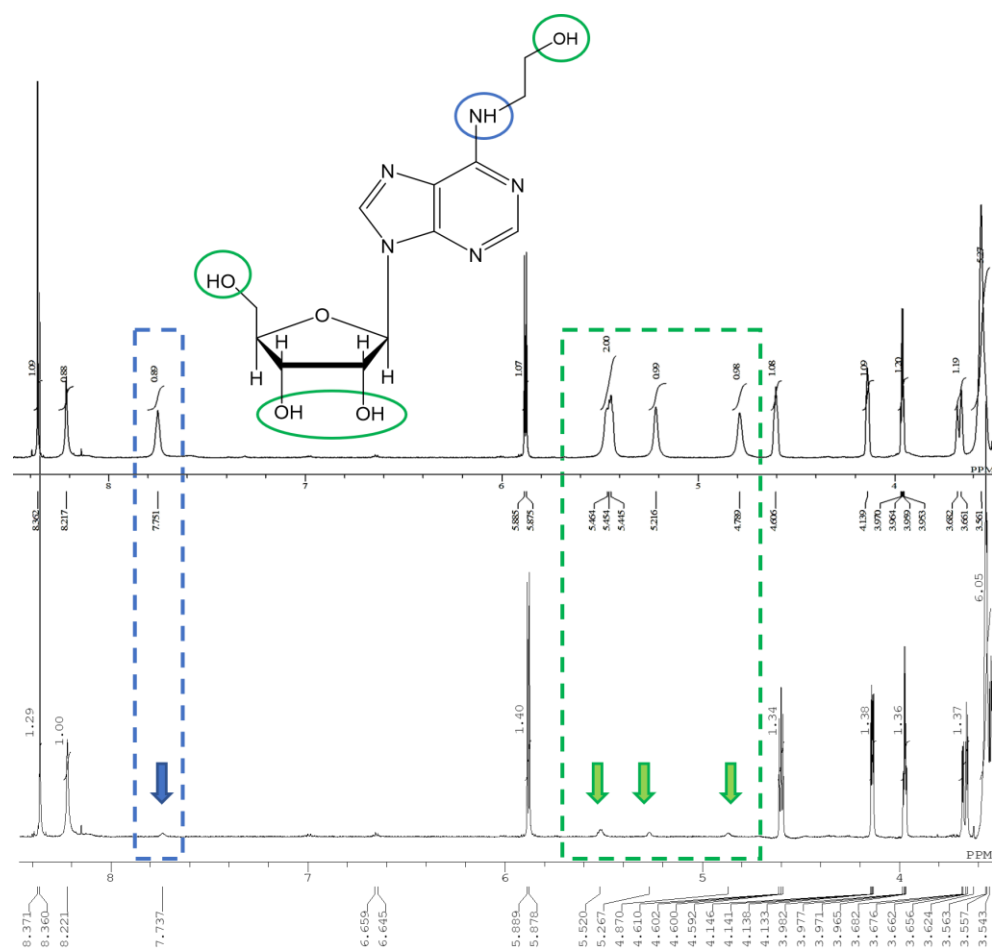

**Figure S2.** <sup>1</sup>H-NMR spectrum of HEA in DMSO-d<sub>6</sub> solvent (top panel) and spectrum of DMSO-d<sub>6</sub> solution sample with one drop of D<sub>2</sub>O (bottom panel)

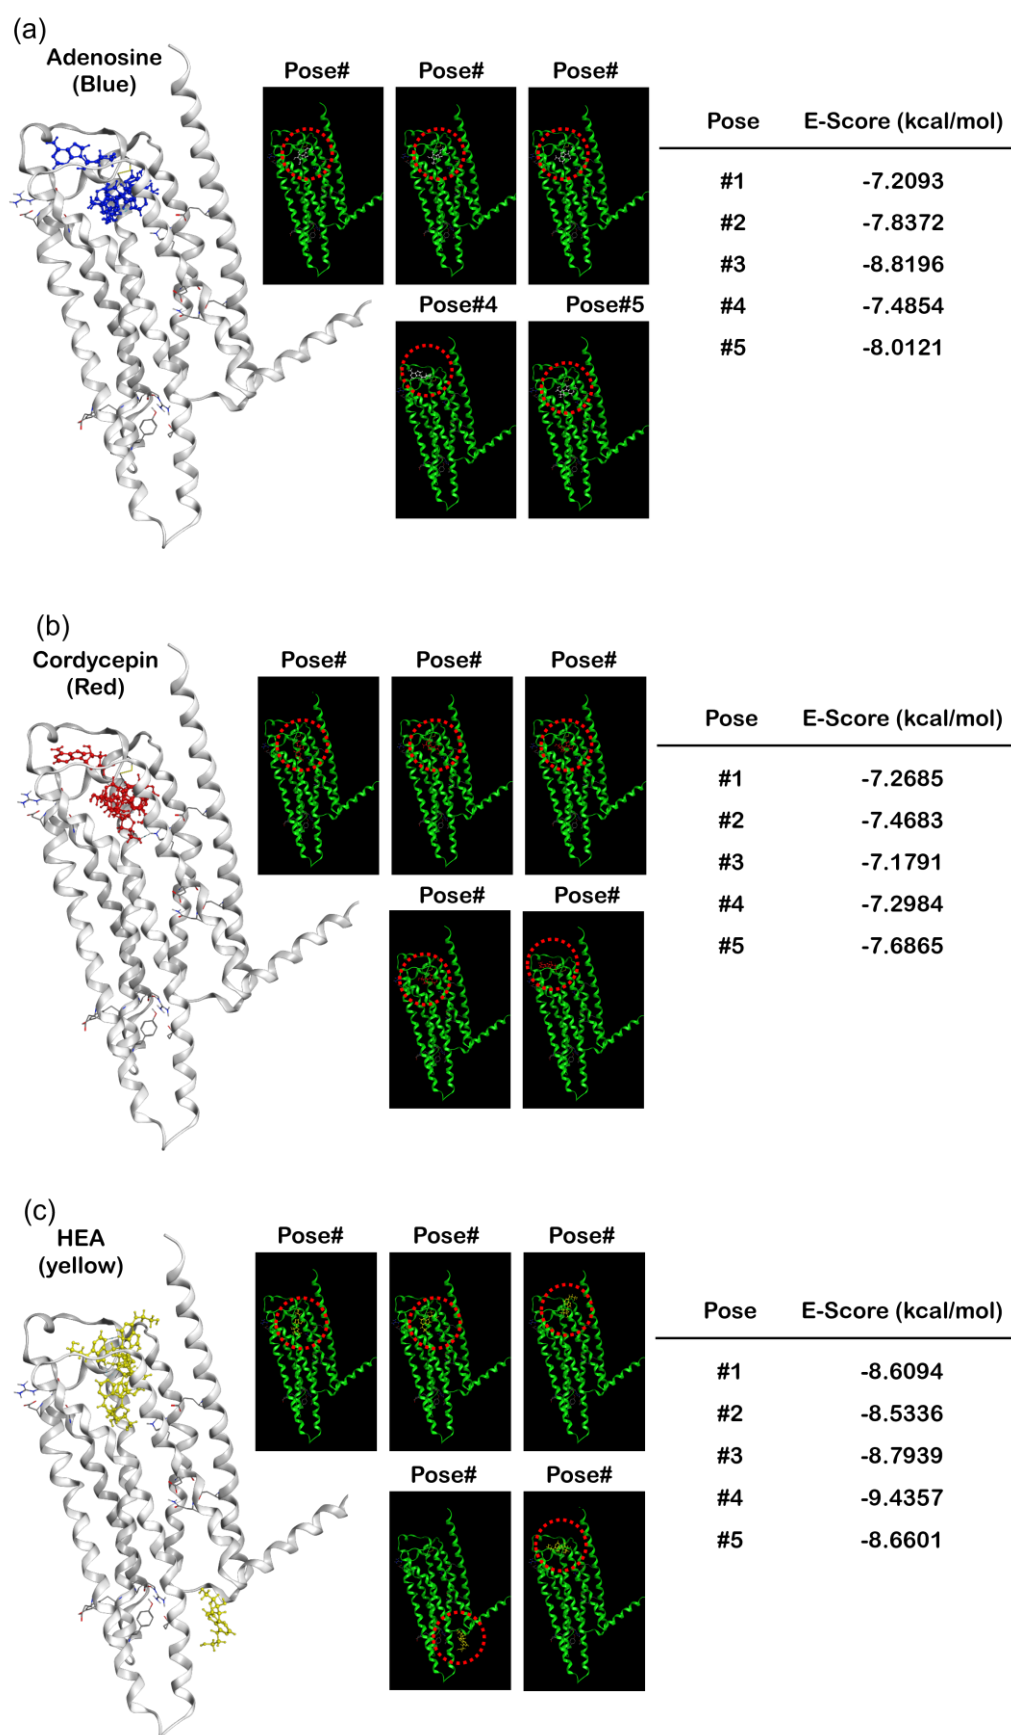

**Figure S3.** Top 5 poses predicted to bind using MOE-Dock for the human A3AR structural model and their respective binding energies (E-score). (a), (b), and (c) indicate adenosine, cordycepin, and HEA, respectively.

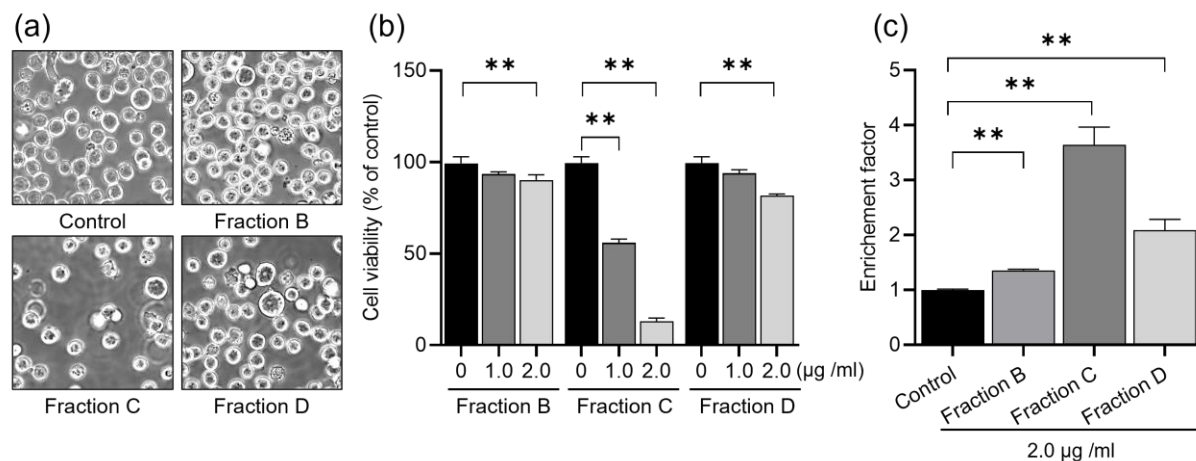

**Figure S4.** The effect of *Cordyceps militaris*-infused spirits on the proliferation inhibition and apoptotic induction of HL-60 cells. Morphological changes (a), proliferation inhibition effect (b) and DNA fragmentation induction (c) by treatment with Fractions B to D. The cells ( $5.0 \times 10^3$  cells/cm<sup>2</sup>) were seeded in 96-well plates for 24 hours and then treated for 48 hours with indicated dose. The cell viability was measured by MTT assay. For DNA fragmentation assay, the cells ( $1.0 \times 10^5$  cells/cm<sup>2</sup>) were seeded into 12-wells plates and then treated for 48 hours with 2.0 µg/ml of each Fractions. The DNA fragmentation was detected by Cell Death Detection ELISA<sup>PLUS</sup> kit. Each value represents the mean  $\pm$  S.D. of triplicate cultures and Columns with asterisk letters denoted significant differences (\*\*  $p < 0.01$ ).
